# Supplementary material for: Downscaling and Projection of Multi-CMIP5 Precipitation Using Machine Learning Methods in the Upper Han River Basin
Source: Hindawi journal article supplement (doi:10.1155/2020/8680436), 2020-03-09
Supplement: f1 [file 8680436.f1.pdf]

Supplementary materials for the article ‘Downscaling and projection of multi-CMIP5 precipitation using machine learning methods in the Upper Han river basin

Ren Xu<sup>1,2</sup>, Nengcheng Chen<sup>2,3</sup>, Yumin Chen<sup>1</sup>, Zeqiang Chen<sup>2,3,\*</sup>

<sup>1</sup> School of Resource and Environmental Science, Wuhan University, 129 Luoyu Road, Wuhan 430079, China

<sup>2</sup> State Key Laboratory of Information Engineering in Surveying, Mapping, and Remote Sensing, Wuhan University, 129 Luoyu Road, Wuhan 430079, China

<sup>3</sup> Collaborative Innovation Center of Geospatial Technology, Wuhan University, Wuhan 430079, China

\* Correspondence: ZeqiangChen@whu.edu.cn; Tel.: +86-13871025965

The supplementary materials mainly include the processes and details of Bayesian hyper-parameter optimization for multilayer perceptron (MLP), support vector regression (SVR), and random forest (RF) for region mean. In addition, the supplementary materials include the evaluation of 21 NEX-GDDP models and MME model for specific stations in this region, and the changes of projected 21st century precipitation for each station. Each section has been refereed and cited in the manuscript.

The aims of the supplementary materials are to supply the processes and details of Bayesian hyper-parameter optimization, and the models evaluation and future changes of specific station.

The contents of the supplementary materials include:

- 1. Details of Bayesian hyper-parameter optimization for MLP**
- 2. Details of Bayesian hyper-parameter optimization for RF**
- 3. Details of Bayesian hyper-parameter optimization for SVR**
- 4. The evaluation of ML downscaled models for specific stations in this region**
- 5. The changes of projected 21st precipitation for each station**

# 1. Details of Bayesian hyper-parameter optimization for MLP

This section discussed the used software for hyper-parameter optimization, and presented the diagrams of the optimization process and optimization results of MLP methods for the region mean. This study used python's 'hyperopt' package to implement BHO for MLP. The mean squared error (MSE) was used as the optimization objective for MLP. Table S1 represents the optimal results of MLP for region mean. **The elements of the first row represent optimized hyper-parameters.**

Table S1: Optimal results of Bayesian hyper-parameter optimization for MLP for region

|             | mean       |          |     |            |          |        |          |      |
|-------------|------------|----------|-----|------------|----------|--------|----------|------|
|             | activation | alpha    | HLZ | LR         | Max_iter | Solver | tol      | MSE  |
| <b>AC10</b> | tanh       | 1.024201 | 20  | adaptive   | 1500     | adam   | 0.00319  | 1444 |
| <b>AC13</b> | logistic   | 9.831136 | 12  | adaptive   | 125      | lbfgs  | 0.008452 | 1605 |
| <b>GG</b>   | tanh       | 4.26283  | 16  | adaptive   | 1152     | adam   | 0.002589 | 1501 |
| <b>GH</b>   | tanh       | 8.535319 | 14  | adaptive   | 1385     | adam   | 0.000246 | 1511 |
| <b>GM</b>   | logistic   | 3.838534 | 14  | adaptive   | 413      | adam   | 0.006199 | 1528 |
| <b>GR</b>   | tanh       | 9.454777 | 12  | adaptive   | 1521     | adam   | 0.003523 | 1755 |
| <b>IN</b>   | logistic   | 7.885871 | 11  | invscaling | 145      | lbfgs  | 0.005522 | 1520 |
| <b>Nor</b>  | logistic   | 9.299373 | 10  | constant   | 1511     | lbfgs  | 0.000955 | 1458 |
| <b>MME</b>  | tanh       | 3.534963 | 6   | adaptive   | 834      | adam   | 0.000142 | 1340 |
| <b>BMA</b>  | logistic   | 9.045651 | 9   | constant   | 1360     | lbfgs  | 0.007592 | 1278 |

\* HLZ denotes hidden\_layer\_sizes; LR denotes learning\_rate.

Figs. S1-S10 express the optimal process for region mean. Noting that the X axis of each subplot denote the corresponding hyper-parameters. **Y axis denote the MSE.** The hyper-parameter group which minimizes the MSE are regarded as the optimal parameters.

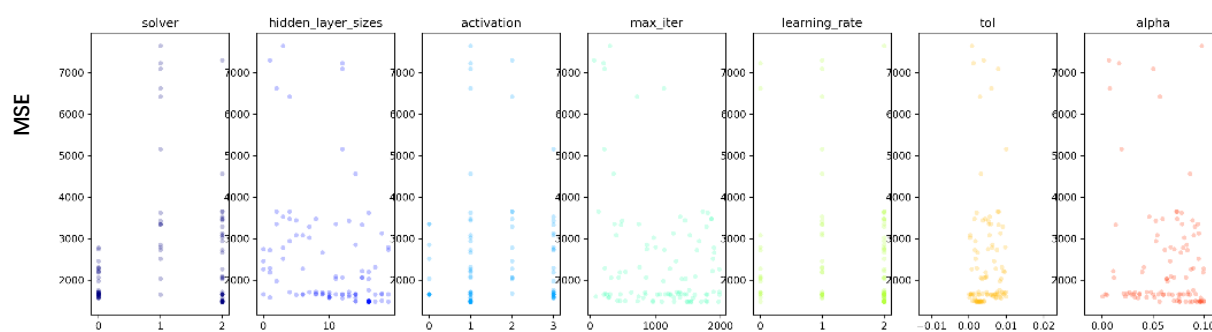

Figure S1: Bayesian hyper-parameter optimization process of MLP downscaling modelling of Ac10 for region mean

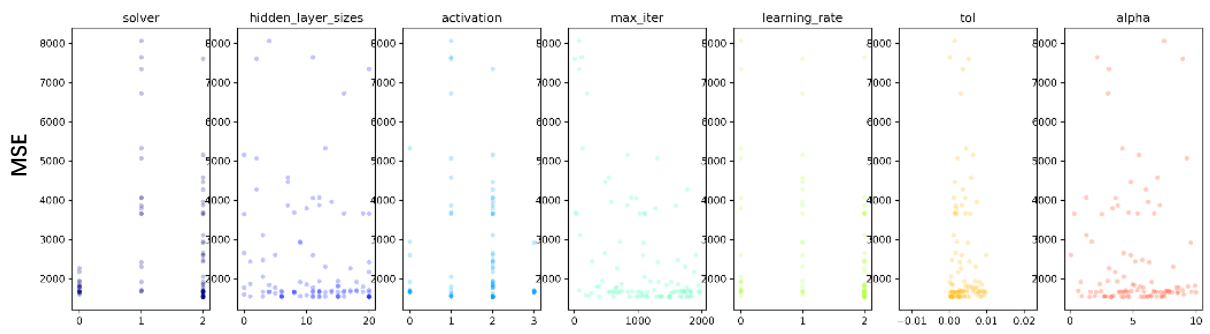

Figure S2: Bayesian hyper-parameter optimization process of MLP downscaling modelling of Ac13 for region mean

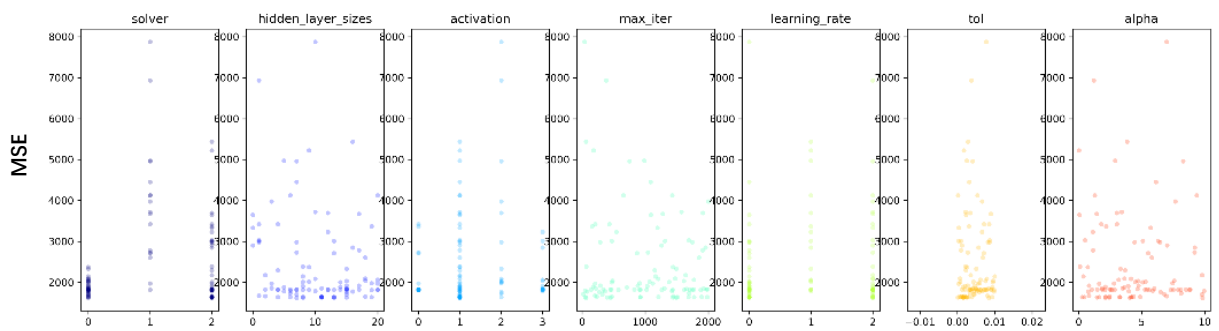

Figure S3: Bayesian hyper-parameter optimization process of MLP downscaling modelling of GG for region mean

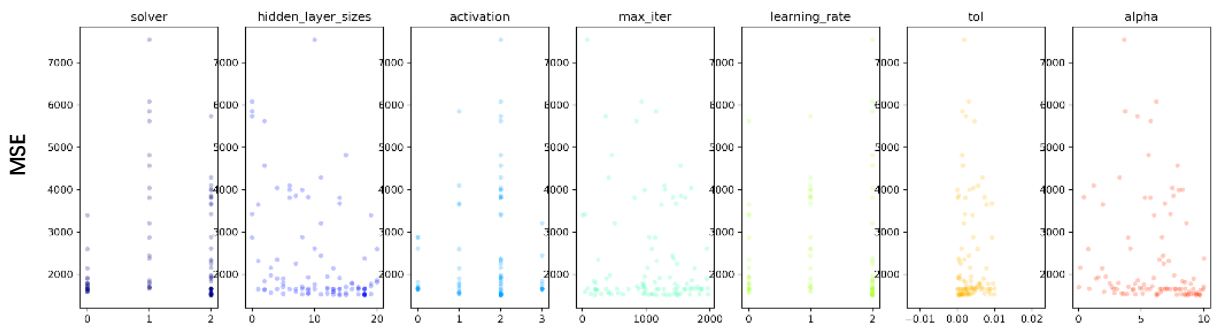

Figure S4: Bayesian hyper-parameter optimization process of MLP downscaling modelling of GH for region mean

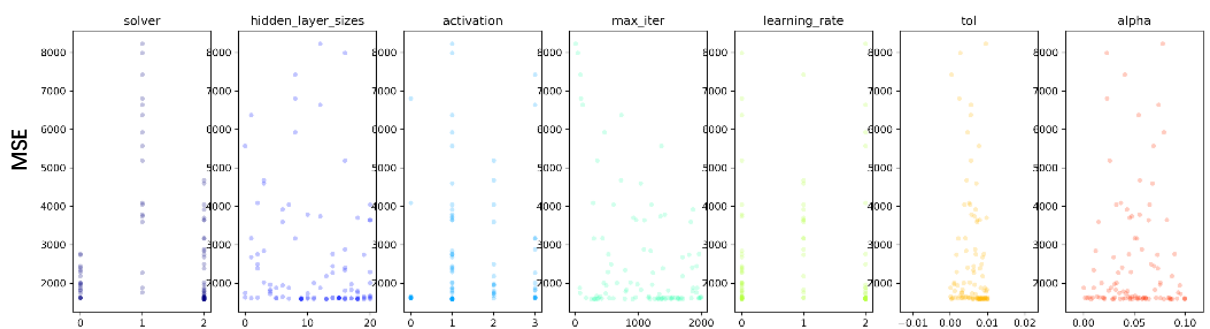

Figure S5: Bayesian hyper-parameter optimization process of MLP downscaling modelling of GM for region mean

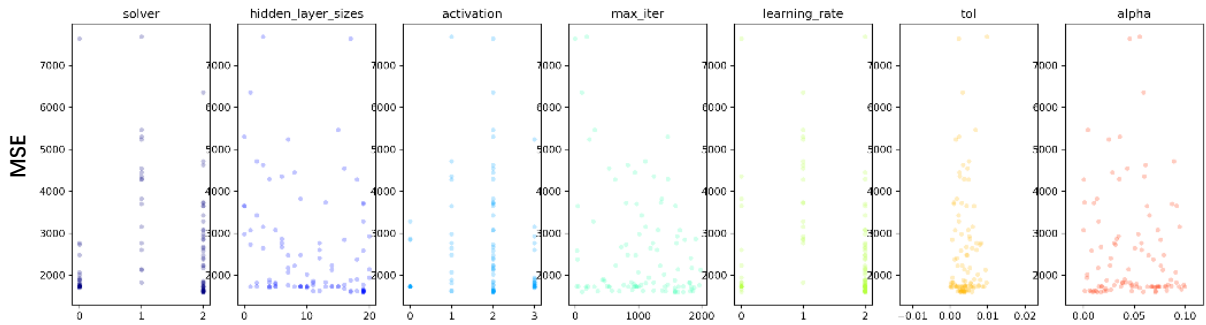

Figure S6: Bayesian hyper-parameter optimization process of MLP downscaling modelling of GR for region mean

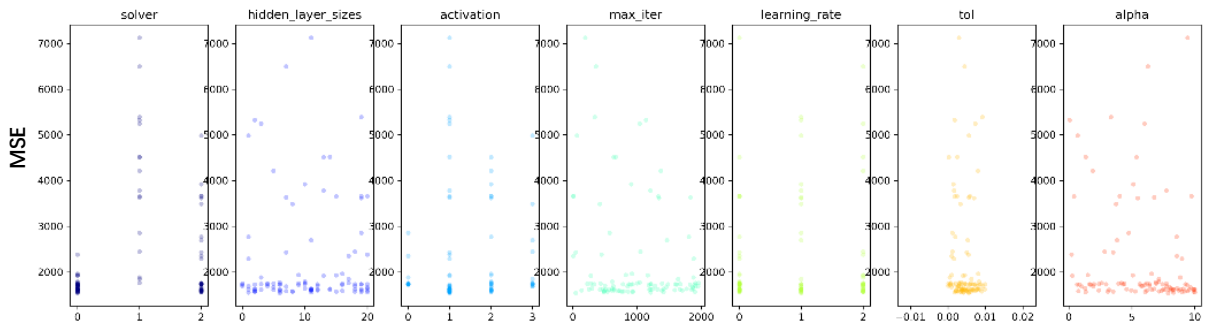

Figure S7: Bayesian hyper-parameter optimization process of MLP downscaling modelling of IN for region mean

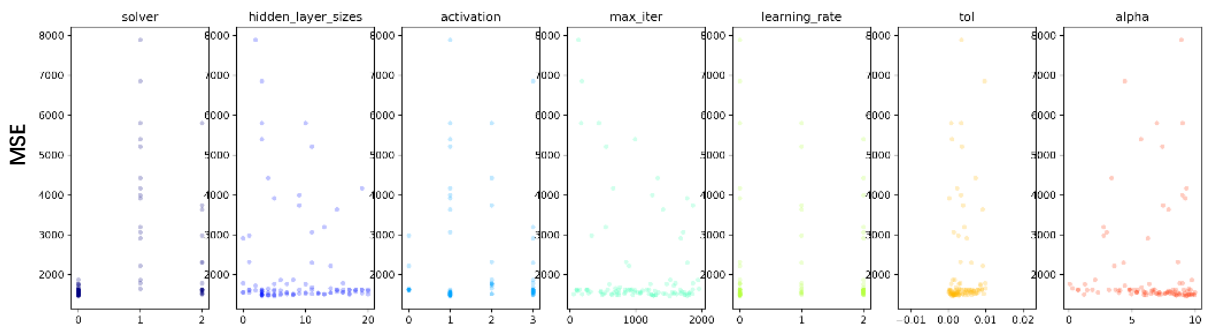

Figure S8: Bayesian hyper-parameter optimization process of MLP downscaling modelling of Nor for region mean

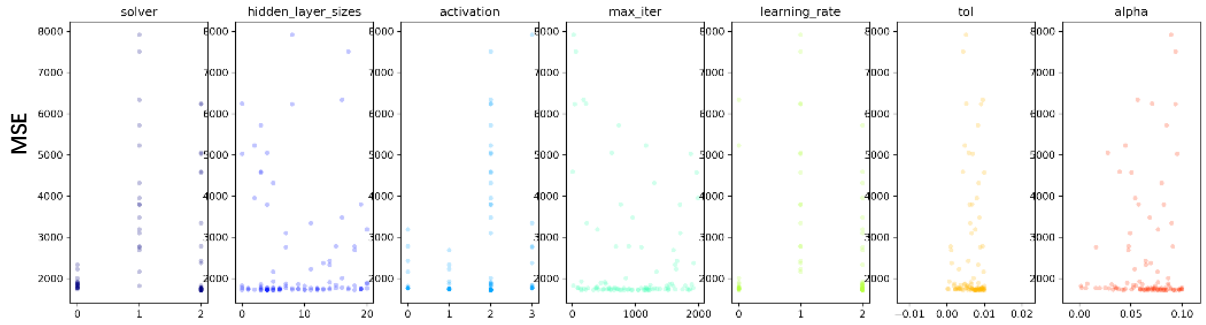

Figure S9: Bayesian hyper-parameter optimization process of MLP downscaling modelling of MME for region mean

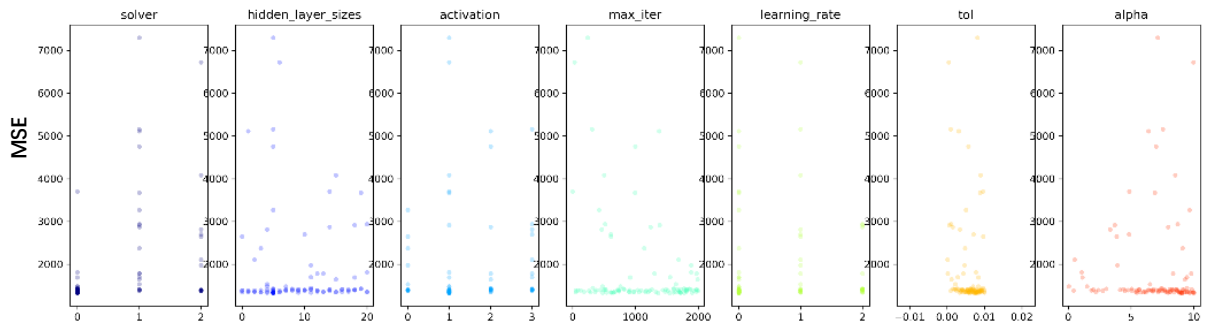

Figure S10: Bayesian hyper-parameter optimization process of MLP downscaling modelling of BMA for region mean

## 2. Details of Bayesian hyper-parameter optimization for RF

This section discussed the used software for hyper-parameter optimization, and presented the diagrams of the optimization process and optimization results of MLP methods for the region mean. This study used python's 'hyperopt' package to implement BHO for RF. The mean squared error (MSE) was used as the optimization objective for RF. Table S1 represents the optimal results of MLP for region mean. **The elements of the first row represent optimized hyper-parameters.**

Table S2: Optimal results of Bayesian hyper-parameter optimization for RF for region mean

|             | max_depth | max_features | n_estimators | MSE   |
|-------------|-----------|--------------|--------------|-------|
| <b>AC10</b> | 10        | 5            | 298          | 1562. |
| <b>AC13</b> | 18        | 3            | 512          | 1604  |
| <b>GG</b>   | 5         | 3            | 498          | 1581  |
| <b>GH</b>   | 4         | 6            | 985          | 1551  |
| <b>GM</b>   | 6         | 4            | 127          | 1630  |
| <b>GR</b>   | 12        | 3            | 967          | 1657  |
| <b>IN</b>   | 6         | 3            | 934          | 1549  |
| <b>Nor</b>  | 13        | 2            | 451          | 1530  |
| <b>MME</b>  | 4         | 2            | 622          | 1440  |
| <b>BMA</b>  | 4         | 2            | 190          | 1401  |

Figs. S11-S20 express the optimal process for region mean. Noting that the X axis of each subplot denotes the values of corresponding hyper-parameters. **Y axis denotes the MSE.** The hyper-parameter group which minimizes the MSE are the optimal parameters.

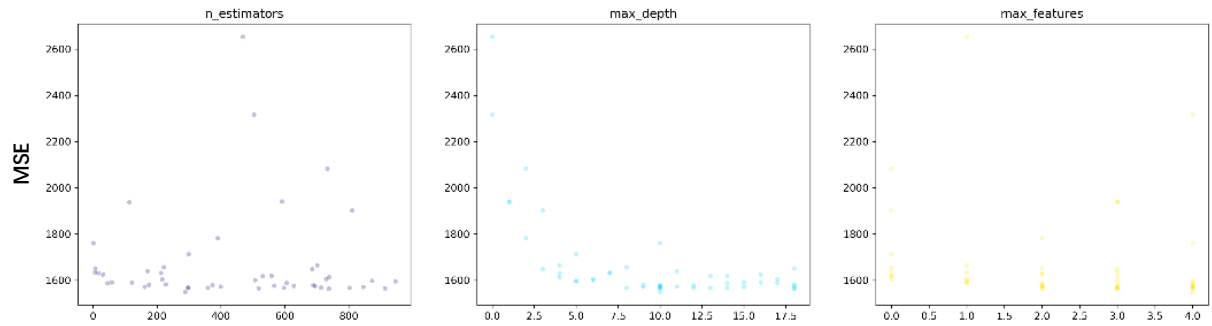

Figure S11: Bayesian hyper-parameter optimization process of RF downscaling modelling of AC10 for region mean

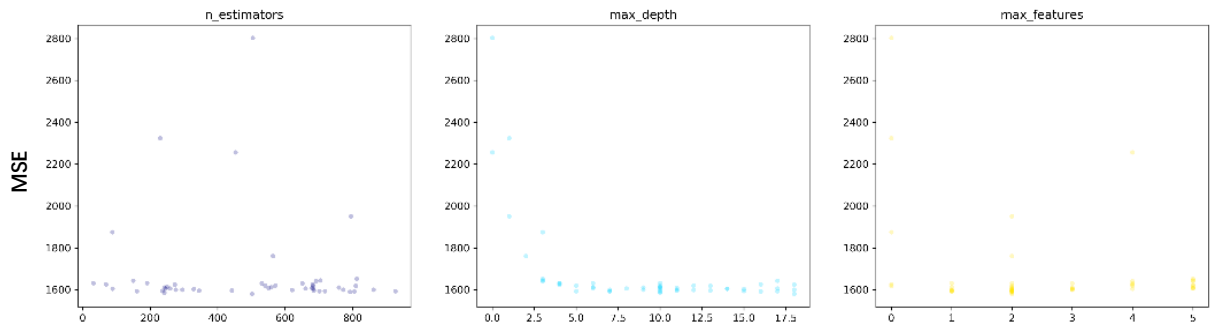

Figure S12: Bayesian hyper-parameter optimization process of RF downscaling modelling of AC13 for region mean

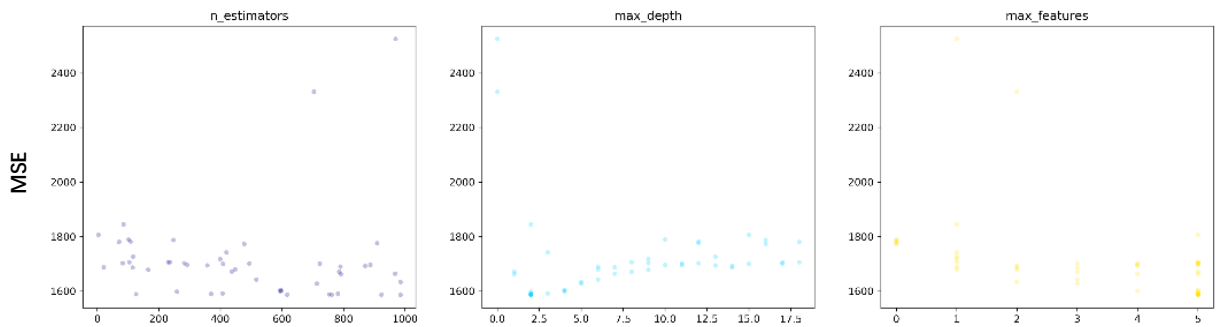

Figure S13: Bayesian hyper-parameter optimization process of RF downscaling modelling of GG for region mean

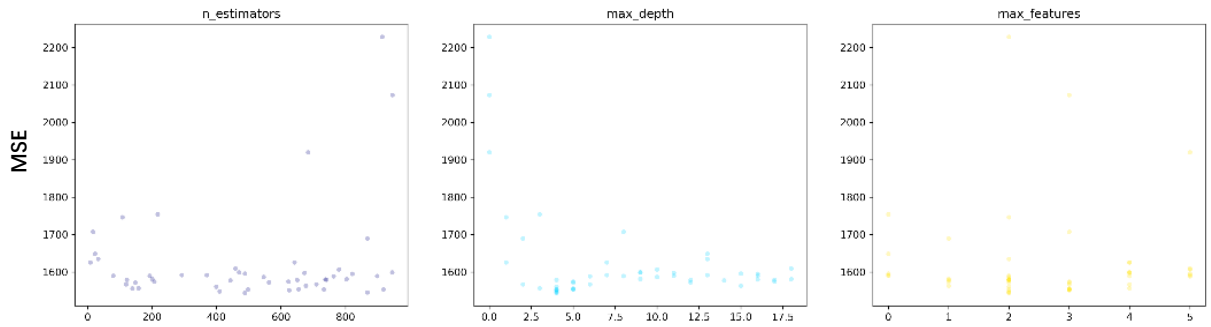

Figure S14: Bayesian hyper-parameter optimization process of RF downscaling modelling of GH for region mean

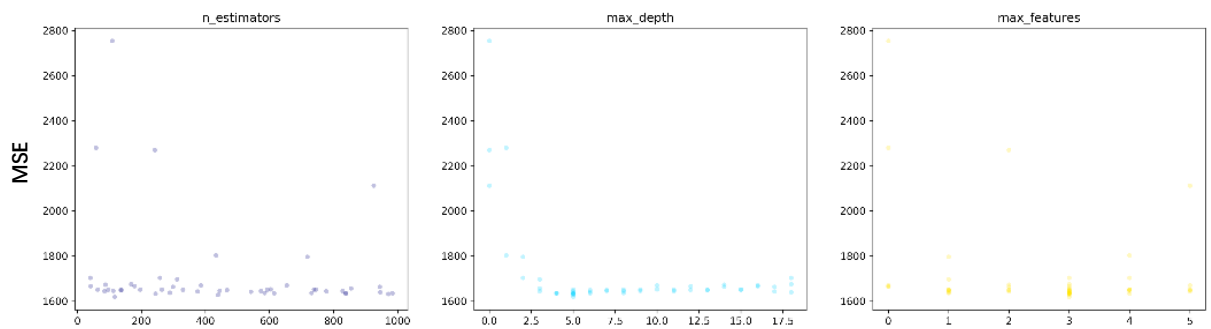

Figure S15: Bayesian hyper-parameter optimization process of RF downscaling modelling of GM for region mean

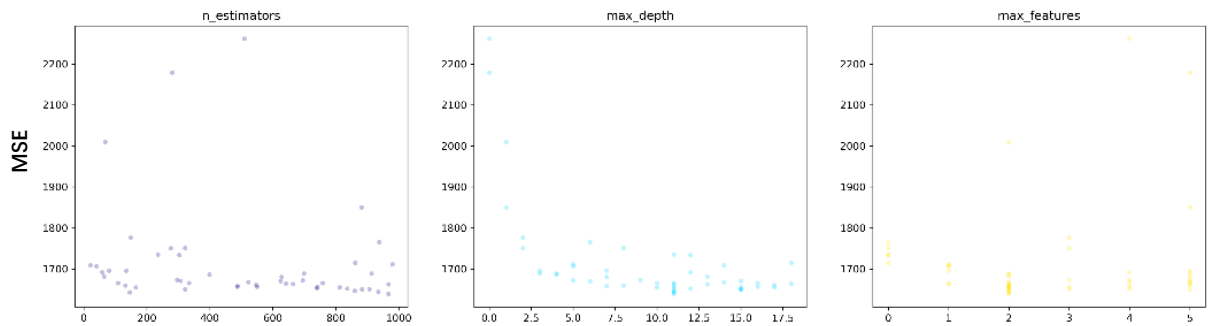

Figure S16: Bayesian hyper-parameter optimization process of RF downscaling modelling of GR for region mean

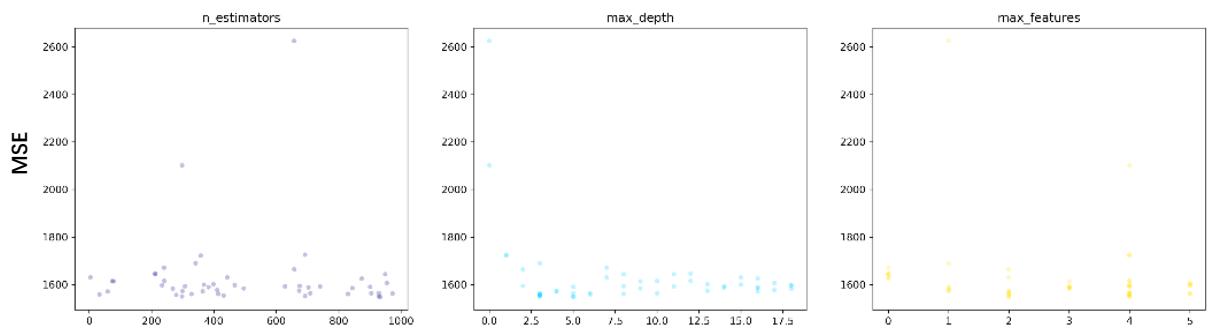

Figure S17: Bayesian hyper-parameter optimization process of RF downscaling modelling of IN for region mean

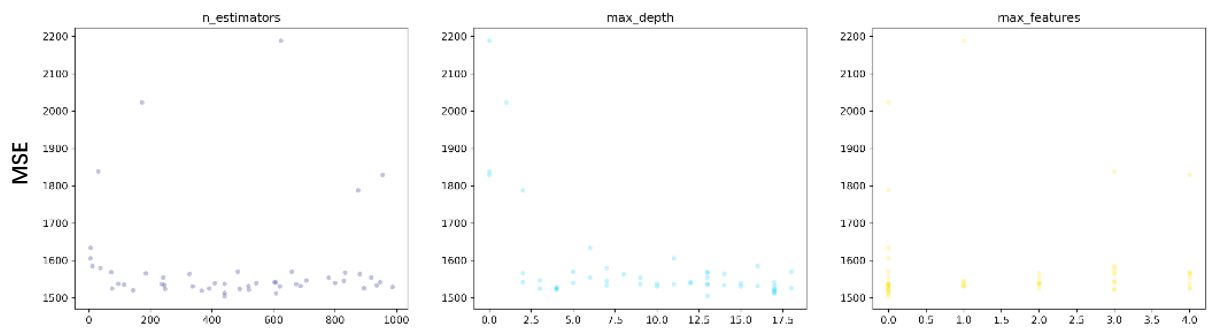

Figure S18: Bayesian hyper-parameter optimization process of RF downscaling modelling of Nor for region mean

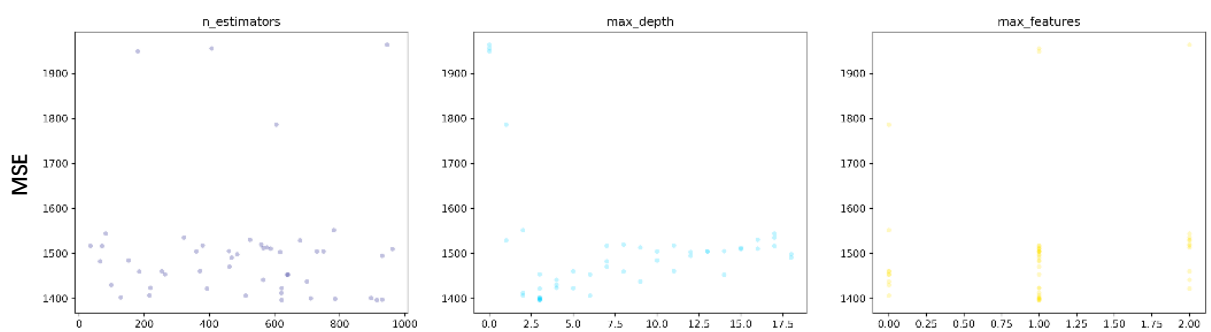

Figure S19: Bayesian hyper-parameter optimization process of RF downscaling modelling of MME for region mean

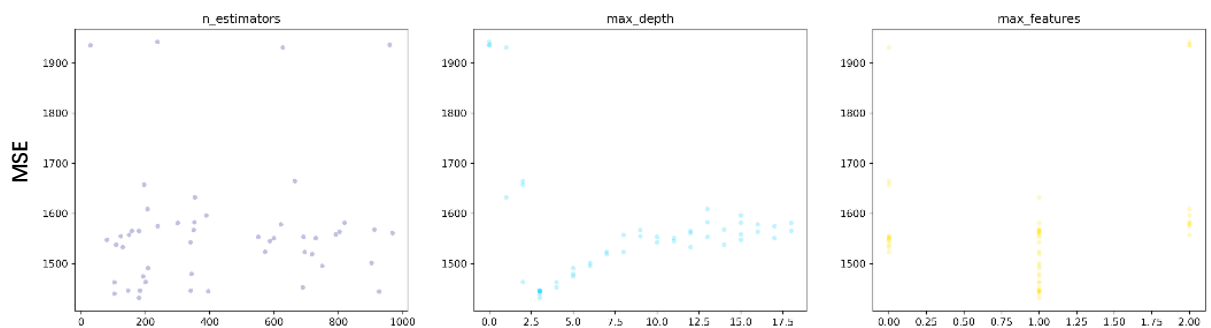

Figure S20: Bayesian hyper-parameter optimization process of RF downscaling modelling of BMA for region mean

### 3. Details of Bayesian hyper-parameter optimization for SVR

This section discussed the used software for hyper-parameter optimization, and presented the diagrams of the optimization process and optimization results of SVR methods for the region mean. This study used MATLAB's 'fitsvm' function for SVM because it is a self-contained function in MATLAB 2016b. **The loss function was deemed** as the optimization objective for SVR. Table S3 represents the optimal results of SVR for region mean. **The elements of the row line represent optimized hyper-parameters.**



Table S3: Optimal results of Bayesian hyper-parameter optimization of SVR for region mean

|             | BoxConstraint | KernelScale | Epsilon  | KernelFunction  | PolynomialOrder | Standardize | Objective |
|-------------|---------------|-------------|----------|-----------------|-----------------|-------------|-----------|
| <b>AC10</b> | 976.76        | 856.48      | 0.47992  | Gaussian        | NaN             | false       | 7.3573    |
| <b>AC13</b> | 984.83        | 80.665      | 1.4186   | Gaussian        | NaN             | false       | 7.3572    |
| <b>GG</b>   | 43.612        | 89.569      | 0.5045   | Gaussian        | NaN             | false       | 7.4439    |
| <b>GH</b>   | 981.77        | 41.537      | 15.467   | Gaussian        | NaN             | false       | 7.4516    |
| <b>GM</b>   | 949.64        | NaN         | 14.106   | Polynomial(rbf) | 1               | true        | 7.3604    |
| <b>GR</b>   | 637.68        | 61.876      | 0.071061 | gaussian        | NaN             | false       | 7.4265    |
| <b>IN</b>   | 203.68        | NaN         | 0.30124  | Polynomial(rbf) | 2               | true        | 7.406     |
| <b>Nor</b>  | 753.41        | 144.223     | 0.12571  | gaussian        | NaN             | true        | 7.4268    |
| <b>MME</b>  | 12.972        | NaN         | 8.73     | Polynomial      | 2               | true        | 7.2276    |
| <b>BMA</b>  | 881.15        | NaN         | 0.37308  | Polynomial      | 2               | True        | 7.2081    |

The following Figs S21-S30 express the optimal process. Noting that the X axis denote numbers of iteration; Y axis denote the value of loss function. The hyper-parameter group which minimizes the MSE are the optimal parameters.

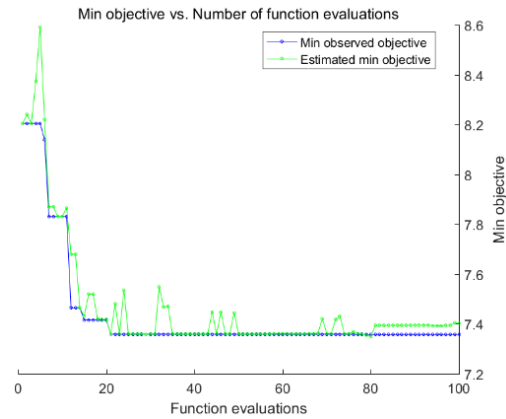

Figure S21: Bayesian hyper-parameter optimization process of SVR downscaling modelling of AC10 region mean

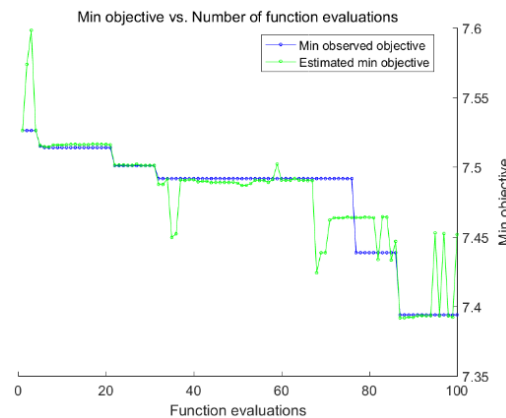

(m-n)

Figure S22: Bayesian hyper-parameter optimization process of SVR downscaling modelling of AC13 for region mean

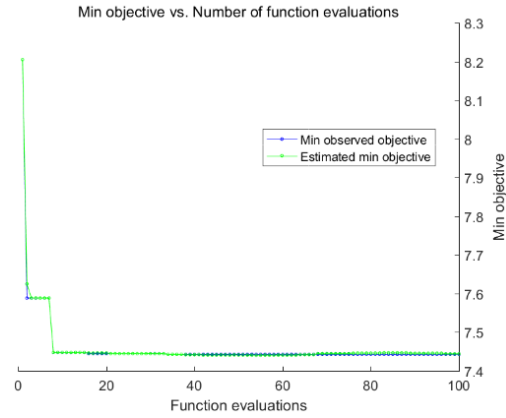

Figure S23: Bayesian hyper-parameter optimization process of SVR downscaling modelling of GG for region mean

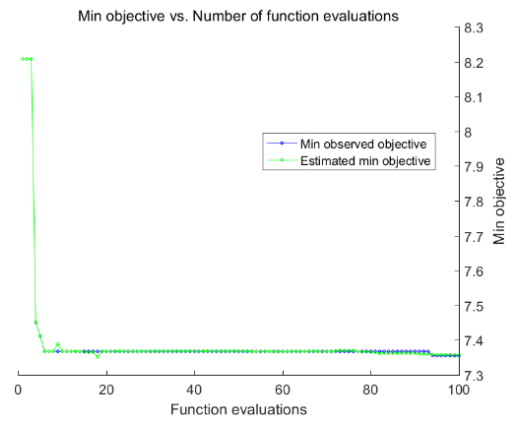

Figure S24: Bayesian hyper-parameter optimization process of SVR downscaling modelling of GH for region mean

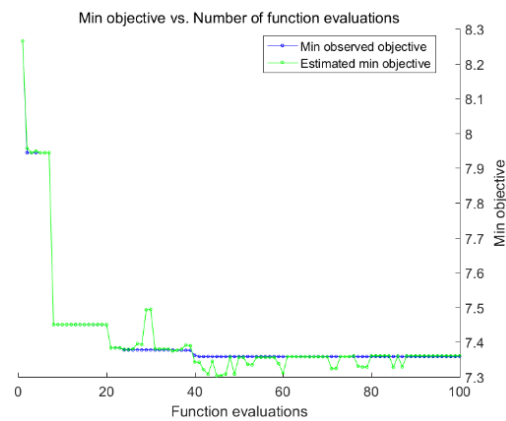

Figure S25: Bayesian hyper-parameter optimization process of SVR downscaling modelling of GM for region mean

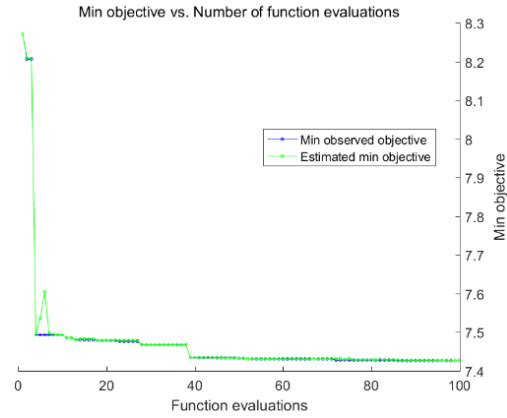

Figure S26: Bayesian hyper-parameter optimization process of SVR downscaling modelling of GR for region mean

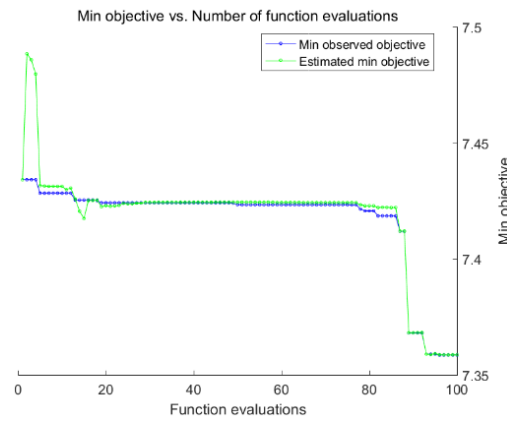

Figure S27: Bayesian hyper-parameter optimization process of SVR downscaling modelling of IN for region mean

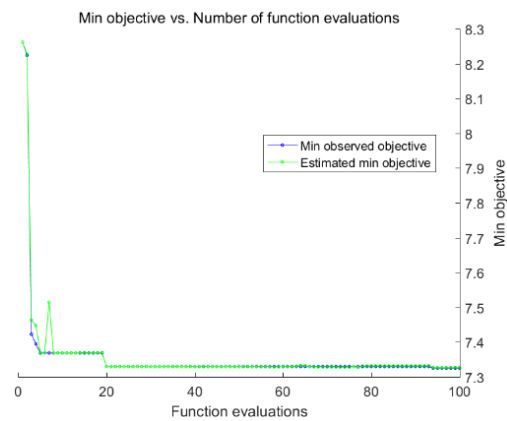

Figure S28: Bayesian hyper-parameter optimization process of SVR downscaling modelling of Nor for region mean

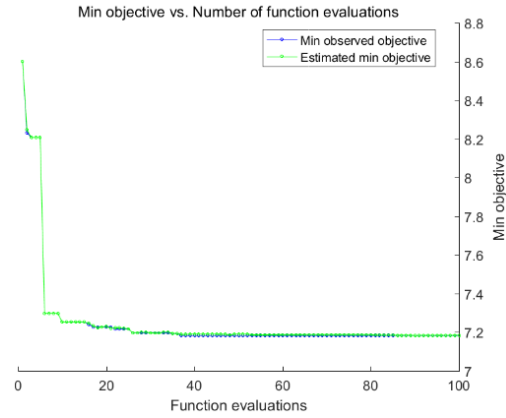

Figure S29: Bayesian hyper-parameter optimization process of SVR downscaling modelling of MME for region mean

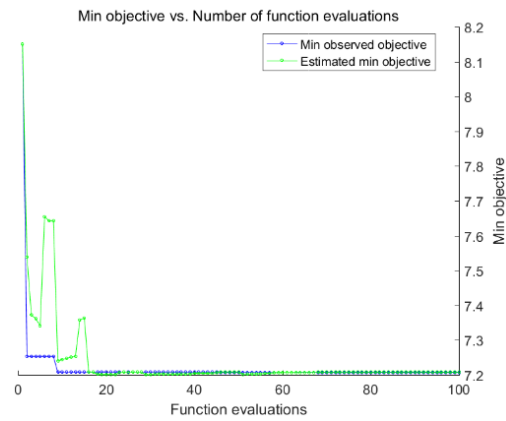

Figure S30: Bayesian hyper-parameter optimization process of SVR downscaling modelling of BMA for region mean

#### 4. The evaluation of ML downscaled models for specific stations in this region

Table content:

- Table S4 The validation results of MLP downscaled models for specific stations in this region
- Table S5 The validation results of SVR downscaled models for specific stations in this region
- Table S6 The validation results of RF downscaled models for specific stations in this region

Table S4: the validation results of MLP downscaled models for specific stations in this region

| Mode  |       | 1      | 2     | 3     | 4      | 5      | 6     | 7      | 8      | 9      | 10    | 11     | 12    | 13    |
|-------|-------|--------|-------|-------|--------|--------|-------|--------|--------|--------|-------|--------|-------|-------|
| AC1.0 | CC    | 0.74   | 0.71  | 0.65  | 0.72   | 0.69   | 0.71  | 0.66   | 0.69   | 0.67   | 0.68  | 0.65   | 0.70  | 0.54  |
|       | RMS   | 43.46  | 53.61 | 55.97 | 54.58  | 40.17  | 45.42 | 53.71  | 53.66  | 57.52  | 47.96 | 48.10  | 43.94 | 53.06 |
|       | Pbias | -15.56 | -9.78 | 13.07 | -7.56  | -13.32 | 6.41  | 11.18  | -2.88  | 1.68   | -6.01 | -0.71  | -1.98 | 5.64  |
| AC1.3 | CC    | 0.72   | 0.70  | 0.62  | 0.70   | 0.64   | 0.67  | 0.63   | 0.69   | 0.66   | 0.66  | 0.61   | 0.71  | 0.53  |
|       | RMS   | 45.08  | 54.35 | 57.76 | 56.10  | 42.45  | 48.24 | 55.48  | 53.85  | 58.80  | 49.26 | 50.47  | 43.56 | 53.52 |
|       | Pbias | 4.94   | 4.24  | 1.99  | 5.55   | 5.76   | -6.07 | -4.92  | -5.70  | -10.78 | -7.11 | 5.89   | 8.50  | 1.83  |
| GG    | CC    | 0.73   | 0.71  | 0.66  | 0.72   | 0.67   | 0.70  | 0.62   | 0.64   | 0.68   | 0.69  | 0.63   | 0.72  | 0.56  |
|       | RMS   | 44.41  | 53.22 | 55.28 | 54.45  | 40.95  | 46.50 | 55.87  | 57.02  | 56.76  | 47.46 | 49.51  | 42.64 | 52.38 |
|       | Pbias | -11.87 | -4.05 | 10.45 | -8.78  | -7.51  | 3.79  | 1.10   | 1.32   | -7.38  | 1.87  | -1.10  | 1.31  | -4.11 |
| GM    | CC    | 0.75   | 0.72  | 0.65  | 0.73   | 0.65   | 0.70  | 0.63   | 0.65   | 0.67   | 0.67  | 0.64   | 0.69  | 0.54  |
|       | RMS   | 43.08  | 52.37 | 56.16 | 53.61  | 41.80  | 46.21 | 55.48  | 56.27  | 57.71  | 48.79 | 49.11  | 44.51 | 53.68 |
|       | Pbias | 3.85   | 11.77 | 11.49 | -5.88  | -8.44  | -6.95 | -7.77  | 6.71   | 18.76  | 12.47 | 5.93   | 1.39  | 5.98  |
| GH    | CC    | 0.73   | 0.72  | 0.66  | 0.71   | 0.66   | 0.69  | 0.62   | 0.64   | 0.65   | 0.68  | 0.63   | 0.73  | 0.52  |
|       | RMS   | 44.50  | 52.30 | 55.36 | 55.29  | 41.39  | 46.58 | 56.07  | 57.35  | 58.71  | 47.97 | 49.30  | 42.03 | 54.14 |
|       | Pbias | -0.89  | -3.33 | -3.97 | 12.97  | 9.64   | 14.38 | -0.54  | -2.86  | 14.37  | -1.11 | 9.23   | 2.51  | 5.15  |
| GR    | CC    | 0.71   | 0.70  | 0.64  | 0.70   | 0.64   | 0.67  | 0.61   | 0.69   | 0.64   | 0.65  | 0.61   | 0.69  | 0.54  |
|       | RMS   | 45.94  | 53.94 | 56.96 | 56.48  | 42.42  | 48.23 | 56.64  | 53.55  | 59.46  | 49.67 | 50.64  | 44.64 | 53.16 |
|       | Pbias | -4.33  | -0.65 | 1.45  | 5.82   | 4.35   | 1.05  | 1.05   | 4.07   | 13.71  | 5.41  | -8.52  | -2.75 | 6.93  |
| IN    | CC    | 0.74   | 0.71  | 0.64  | 0.72   | 0.66   | 0.69  | 0.63   | 0.64   | 0.66   | 0.68  | 0.62   | 0.72  | 0.51  |
|       | RMS   | 43.77  | 53.68 | 56.62 | 54.84  | 41.54  | 46.93 | 55.28  | 57.26  | 58.19  | 48.04 | 49.76  | 42.99 | 54.35 |
|       | Pbias | 2.08   | 8.45  | 5.89  | -13.28 | 9.09   | -6.29 | 3.34   | -3.90  | 3.80   | -2.45 | 8.70   | 11.41 | -9.40 |
| Nor   | CC    | 0.73   | 0.71  | 0.65  | 0.73   | 0.66   | 0.70  | 0.65   | 0.68   | 0.67   | 0.68  | 0.64   | 0.74  | 0.58  |
|       | RMS   | 44.55  | 53.12 | 55.98 | 53.72  | 41.29  | 46.26 | 54.07  | 54.62  | 57.61  | 47.91 | 48.98  | 41.60 | 51.62 |
|       | Pbias | -9.71  | 11.13 | -4.00 | 4.92   | -12.28 | -5.19 | 4.66   | -12.82 | -14.56 | -9.05 | 3.66   | -1.48 | -9.55 |
| MME   | CC    | 0.75   | 0.74  | 0.68  | 0.74   | 0.68   | 0.72  | 0.66   | 0.68   | 0.70   | 0.69  | 0.65   | 0.73  | 0.57  |
|       | RMS   | 41.80  | 50.13 | 53.48 | 51.77  | 39.95  | 44.26 | 53.27  | 53.69  | 54.96  | 47.00 | 48.33  | 41.80 | 52.02 |
|       | Pbias | -4.22  | -3.15 | 2.99  | -2.13  | -6.70  | 9.55  | -8.10  | -18.18 | -2.49  | -3.69 | -14.61 | -5.77 | -2.45 |
| BMA   | CC    | 0.76   | 0.75  | 0.68  | 0.77   | 0.70   | 0.73  | 0.68   | 0.68   | 0.71   | 0.70  | 0.67   | 0.74  | 0.56  |
|       | RMS   | 41.21  | 48.87 | 52.88 | 49.64  | 38.50  | 43.41 | 51.50  | 53.12  | 53.57  | 45.68 | 46.60  | 40.43 | 51.14 |
|       | Pbias | -4.11  | -3.56 | 8.69  | -6.41  | -3.92  | 12.00 | -11.89 | 9.93   | -11.90 | -6.15 | 8.99   | -7.18 | 2.60  |

Table S5: the validation results of SVR downscaled models for specific stations in this region

| Mode  |       | 1     | 2     | 3     | 4     | 5     | 6     | 7     | 8     | 9     | 10    | 11    | 12    | 13     |
|-------|-------|-------|-------|-------|-------|-------|-------|-------|-------|-------|-------|-------|-------|--------|
| AC1.0 | CC    | 0.75  | 0.72  | 0.67  | 0.73  | 0.70  | 0.78  | 0.71  | 0.68  | 0.69  | 0.74  | 0.66  | 0.73  | 0.56   |
|       | RMS   | 43.76 | 53.03 | 55.12 | 54.38 | 39.81 | 41.45 | 51.75 | 55.36 | 56.78 | 45.09 | 48.49 | 42.42 | 53.61  |
|       | Pbias | -3.03 | -3.50 | -4.03 | -0.96 | 5.06  | -2.16 | -7.17 | -5.32 | -1.73 | -4.27 | -4.65 | 4.30  | -8.29  |
| AC1.3 | CC    | 0.71  | 0.74  | 0.62  | 0.71  | 0.63  | 0.64  | 0.63  | 0.67  | 0.64  | 0.69  | 0.65  | 0.72  | 0.57   |
|       | RMS   | 46.12 | 52.54 | 58.61 | 56.18 | 43.52 | 50.38 | 56.28 | 55.60 | 60.19 | 48.40 | 49.75 | 43.25 | 52.92  |
|       | Pbias | -2.26 | -5.09 | -5.08 | -1.73 | -4.94 | -6.63 | -7.44 | -4.93 | -2.55 | -5.85 | -7.82 | 2.94  | -4.36  |
| GG    | CC    | 0.72  | 0.71  | 0.64  | 0.72  | 0.66  | 0.68  | 0.63  | 0.65  | 0.66  | 0.70  | 0.62  | 0.72  | 0.56   |
|       | RMS   | 45.58 | 54.33 | 57.52 | 54.87 | 41.64 | 47.78 | 56.23 | 58.04 | 59.41 | 47.12 | 50.68 | 43.37 | 54.10  |
|       | Pbias | -4.71 | -6.34 | -4.88 | 0.80  | 3.14  | 1.63  | 3.11  | -7.45 | -6.83 | -1.10 | -6.97 | 1.36  | -10.01 |
| GM    | CC    | 0.83  | 0.72  | 0.67  | 0.73  | 0.66  | 0.72  | 0.66  | 0.67  | 0.71  | 0.71  | 0.67  | 0.72  | 0.57   |
|       | RMS   | 36.44 | 53.25 | 55.77 | 54.46 | 41.96 | 45.79 | 54.62 | 55.60 | 55.06 | 46.87 | 47.17 | 43.16 | 52.60  |
|       | Pbias | -1.92 | -2.87 | -2.44 | -3.72 | -5.70 | -4.40 | -7.31 | 0.77  | -3.89 | -3.83 | 7.15  | 4.55  | 0.41   |
| GH    | CC    | 0.73  | 0.73  | 0.68  | 0.73  | 0.69  | 0.73  | 0.69  | 0.68  | 0.67  | 0.71  | 0.71  | 0.73  | 0.55   |
|       | RMS   | 44.90 | 52.54 | 54.37 | 54.43 | 40.82 | 44.69 | 52.61 | 56.01 | 58.61 | 46.78 | 45.77 | 42.49 | 53.07  |
|       | Pbias | -4.27 | -3.72 | -1.49 | 2.53  | -3.18 | -1.92 | -5.78 | 8.15  | -3.68 | -2.61 | 1.20  | 3.43  | -0.13  |
| GR    | CC    | 0.74  | 0.72  | 0.66  | 0.71  | 0.65  | 0.66  | 0.64  | 0.68  | 0.66  | 0.63  | 0.94  | 0.69  | 0.54   |
|       | RMS   | 44.47 | 52.99 | 56.09 | 56.73 | 42.27 | 49.12 | 56.25 | 55.14 | 59.77 | 51.71 | 23.65 | 44.85 | 53.62  |
|       | Pbias | -3.76 | -3.53 | -5.55 | -5.63 | -3.17 | -4.54 | -8.28 | -4.23 | -7.56 | -5.05 | -0.07 | 0.89  | 5.47   |
| IN    | CC    | 0.75  | 0.84  | 0.80  | 0.76  | 0.67  | 0.70  | 0.63  | 0.65  | 0.70  | 0.68  | 0.69  | 0.74  | 0.58   |
|       | RMS   | 43.43 | 42.26 | 44.79 | 52.58 | 41.75 | 46.89 | 56.21 | 57.54 | 56.37 | 48.74 | 46.97 | 42.12 | 52.56  |
|       | Pbias | -2.55 | -1.51 | 6.43  | -6.30 | -4.64 | -4.65 | -1.27 | -4.94 | -5.05 | -1.95 | 0.22  | 0.18  | -5.75  |
| Nor   | CC    | 0.78  | 0.75  | 0.72  | 0.76  | 0.72  | 0.75  | 0.69  | 0.68  | 0.72  | 0.72  | 0.64  | 0.72  | 0.58   |
|       | RMS   | 41.24 | 50.84 | 51.61 | 51.60 | 39.02 | 43.70 | 52.84 | 55.13 | 54.69 | 46.12 | 49.33 | 43.03 | 51.56  |
|       | Pbias | -1.10 | -3.42 | -1.42 | -3.35 | 2.10  | -2.25 | -2.30 | 0.96  | -4.29 | -2.18 | 0.97  | 1.81  | 2.42   |
| MME   | CC    | 0.78  | 0.75  | 0.71  | 0.78  | 0.74  | 0.75  | 0.71  | 0.70  | 0.75  | 0.72  | 0.68  | 0.74  | 0.58   |
|       | RMS   | 41.31 | 50.13 | 52.70 | 50.20 | 37.76 | 43.32 | 51.05 | 54.05 | 51.89 | 46.92 | 47.41 | 41.65 | 52.03  |
|       | Pbias | 0.26  | 0.63  | -1.11 | -2.01 | -1.37 | 4.51  | -2.29 | 5.25  | -1.21 | -4.53 | -1.98 | 6.38  | -3.16  |
| BMA   | CC    | 0.77  | 0.76  | 0.69  | 0.76  | 0.72  | 0.76  | 0.69  | 0.68  | 0.75  | 0.74  | 0.71  | 0.75  | 0.63   |
|       | RMS   | 42.14 | 49.72 | 54.07 | 52.40 | 39.00 | 42.45 | 52.29 | 54.55 | 52.02 | 44.57 | 45.07 | 40.97 | 50.03  |
|       | Pbias | -1.62 | 1.23  | -2.53 | -4.03 | -4.62 | 0.52  | -1.43 | 4.89  | -3.18 | -0.21 | -2.67 | 3.92  | 7.72   |

Table S6: the validation results of RF downscaled models for specific stations in this region

| Mode  |       | 1      | 2     | 3     | 4     | 5     | 6     | 7     | 8     | 9      | 10     | 11     | 12    | 13    |
|-------|-------|--------|-------|-------|-------|-------|-------|-------|-------|--------|--------|--------|-------|-------|
| AC1.0 | CC    | 0.72   | 0.70  | 0.64  | 0.71  | 0.65  | 0.69  | 0.63  | 0.65  | 0.66   | 0.66   | 0.62   | 0.68  | 0.53  |
|       | RMS   | 44.79  | 54.31 | 56.52 | 55.21 | 42.02 | 46.77 | 55.30 | 56.87 | 58.64  | 49.66  | 49.90  | 45.35 | 53.81 |
|       | Pbias | 3.62   | 11.34 | 14.24 | 9.62  | 2.11  | 12.49 | 5.16  | -8.97 | 5.13   | -4.65  | -5.03  | 6.71  | 8.31  |
| AC.3  | CC    | 0.71   | 0.69  | 0.64  | 0.71  | 0.63  | 0.68  | 0.64  | 0.65  | 0.65   | 0.65   | 0.61   | 0.70  | 0.51  |
|       | RMS   | 45.97  | 54.93 | 56.66 | 55.72 | 42.67 | 47.70 | 55.12 | 56.74 | 58.99  | 49.89  | 50.30  | 44.00 | 54.53 |
|       | Pbias | 7.38   | 6.58  | 5.42  | 7.32  | 13.48 | 10.63 | 8.49  | 9.97  | -5.48  | 7.50   | -5.44  | 9.58  | -2.20 |
| GG    | CC    | 0.72   | 0.69  | 0.65  | 0.71  | 0.66  | 0.67  | 0.61  | 0.62  | 0.67   | 0.67   | 0.62   | 0.70  | 0.55  |
|       | RMS   | 45.25  | 54.64 | 56.19 | 55.50 | 41.43 | 47.93 | 56.59 | 58.54 | 57.91  | 48.71  | 49.90  | 43.95 | 52.88 |
|       | Pbias | -1.98  | 3.41  | -4.07 | -1.92 | -6.01 | -1.87 | 1.76  | -4.84 | -2.72  | -3.98  | 1.95   | 8.78  | 2.81  |
| GM    | CC    | 0.73   | 0.70  | 0.65  | 0.72  | 0.65  | 0.69  | 0.62  | 0.67  | 0.67   | 0.66   | 0.63   | 0.70  | 0.57  |
|       | RMS   | 44.21  | 53.99 | 56.11 | 54.61 | 42.07 | 46.74 | 56.19 | 55.41 | 57.40  | 49.36  | 49.37  | 43.91 | 52.07 |
|       | Pbias | 12.00  | 4.64  | -4.32 | -6.69 | -4.94 | -4.01 | -3.60 | -6.96 | -9.77  | -7.39  | -8.42  | -9.69 | -9.93 |
| GH    | CC    | 0.70   | 0.71  | 0.65  | 0.70  | 0.64  | 0.66  | 0.62  | 0.59  | 0.63   | 0.65   | 0.62   | 0.70  | 0.52  |
|       | RMS   | 46.79  | 53.75 | 56.28 | 56.50 | 42.50 | 48.74 | 55.91 | 59.82 | 60.24  | 49.71  | 49.86  | 43.88 | 54.05 |
|       | Pbias | 122.76 | 6.35  | 4.75  | 2.02  | -2.66 | 16.08 | 12.51 | 15.26 | -1.82  | 117.78 | 7.08   | 11.19 | 12.33 |
| GR    | CC    | 0.72   | 0.73  | 0.65  | 0.70  | 0.63  | 0.66  | 0.60  | 0.66  | 0.65   | 0.64   | 0.60   | 0.68  | 0.52  |
|       | RMS   | 44.76  | 51.70 | 55.99 | 56.35 | 42.60 | 48.77 | 57.08 | 55.83 | 59.03  | 50.51  | 51.10  | 45.29 | 54.15 |
|       | Pbias | 8.46   | 1.45  | 13.57 | 4.04  | 12.51 | 15.86 | 5.72  | -3.38 | 111.63 | 16.61  | 101.08 | 6.68  | 2.97  |
| IN    | CC    | 0.74   | 0.72  | 0.67  | 0.74  | 0.66  | 0.68  | 0.60  | 0.62  | 0.66   | 0.68   | 0.61   | 0.71  | 0.52  |
|       | RMS   | 43.46  | 52.85 | 54.88 | 53.39 | 41.63 | 47.18 | 57.31 | 58.60 | 58.28  | 48.05  | 50.17  | 43.41 | 53.93 |
|       | Pbias | -0.71  | 9.78  | 7.48  | 17.83 | 4.54  | 1.87  | 4.96  | 10.96 | 2.67   | 5.47   | 3.31   | 5.13  | 3.28  |
| Nor   | CC    | 0.72   | 0.70  | 0.64  | 0.72  | 0.67  | 0.70  | 0.63  | 0.66  | 0.66   | 0.67   | 0.64   | 0.71  | 0.57  |
|       | RMS   | 45.23  | 54.12 | 56.46 | 54.57 | 41.08 | 46.55 | 55.41 | 55.64 | 58.10  | 48.88  | 48.85  | 43.12 | 52.33 |
|       | Pbias | 15.20  | -1.27 | 4.18  | 11.95 | -2.42 | -8.80 | -3.00 | -0.34 | -6.68  | -4.85  | -3.62  | -1.09 | -3.56 |
| MME   | CC    | 0.74   | 0.74  | 0.66  | 0.75  | 0.67  | 0.71  | 0.65  | 0.67  | 0.68   | 0.69   | 0.65   | 0.73  | 0.55  |
|       | RMS   | 43.54  | 51.36 | 55.44 | 52.51 | 40.94 | 45.53 | 54.03 | 55.02 | 56.96  | 47.32  | 48.19  | 41.98 | 52.86 |
|       | Pbias | 4.73   | -3.96 | -1.07 | -1.13 | -1.78 | 2.41  | 1.84  | 1.46  | 3.20   | 2.12   | 4.75   | 1.98  | -1.37 |
| BMA   | CC    | 0.77   | 0.74  | 0.68  | 0.75  | 0.69  | 0.74  | 0.66  | 0.71  | 0.69   | 0.69   | 0.67   | 0.74  | 0.58  |
|       | RMS   | 42.38  | 51.90 | 54.90 | 53.12 | 40.54 | 44.80 | 54.45 | 53.64 | 57.49  | 48.31  | 47.96  | 42.42 | 52.14 |
|       | Pbias | 7.46   | 2.16  | -3.02 | -1.43 | 7.62  | 2.00  | -0.61 | 2.65  | 8.91   | 1.51   | 2.04   | 2.54  | -0.75 |

## 5. The changes of projected 21<sup>st</sup> century precipitation for each station

Table S7: Projected changes of each station under RCP4.5 and RCP8.5 (%)

| station | RCP4.5    |           | RCP8.5    |           |
|---------|-----------|-----------|-----------|-----------|
|         | 2040-2069 | 2070-2099 | 2040-2069 | 2070-2099 |
| 1       | -6.28     | -7.20     | -6.30     | -4.87     |
| 2       | 4.97      | 5.13      | 6.08      | 5.77      |
| 3       | -0.61     | -2.30     | 0.55      | -0.05     |
| 4       | 9.76      | 10.53     | 11.99     | 9.51      |
| 5       | -8.85     | -9.66     | -8.02     | -7.10     |
| 6       | -0.37     | 0.30      | 3.11      | 4.47      |
| 7       | 0.80      | 0.33      | -0.56     | 1.78      |
| 8       | 4.19      | 6.20      | 3.90      | 6.53      |
| 9       | 7.91      | 6.02      | 8.96      | 9.97      |
| 10      | -3.60     | -3.28     | -2.04     | -0.98     |
| 11      | -0.87     | 1.34      | -0.78     | 1.33      |
| 12      | 5.27      | 8.21      | 5.12      | 8.37      |
| 13      | 3.31      | 4.78      | 2.96      | 5.13      |
